# Supplementary material for: Spatial Modeling of Vesicle Transport and the Cytoskeleton: The Challenge of Hitting the Right Road
Source: PubMed Central journal article supplement (PMC3257240; doi:10.1371/journal.pone.0029645), 2012-01-12
Supplement: pone.0029645.s003.pdf [file pone.0029645.s003.pdf]

### Text S3: Details of the Vesicle Model

#### (a) Vesicle interaction area

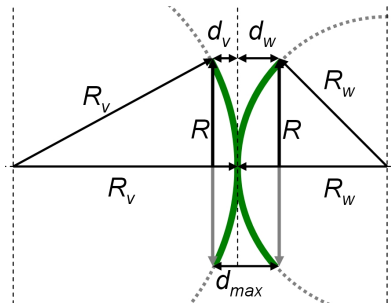

The part of the vesicle surface that is within the maximal distance  $d_{max}$  of the SNARE-interaction is highlighted in green. The interacting surface area  $A$  is calculated neglecting the curvature of the vesicle (assuming  $d_{max} \ll R$ ) as  $A = \pi R^2$  with

$$R = \sqrt{\frac{1}{2}(R_v^2 + R_w^2) - \frac{1}{4}(R_v + R_w - d_{max})^2 - \frac{1}{4} \frac{(R_v^2 - R_w^2)^2}{(R_v + R_w - d_{max})^2}}$$

#### (b) Tug of war between different motor proteins:

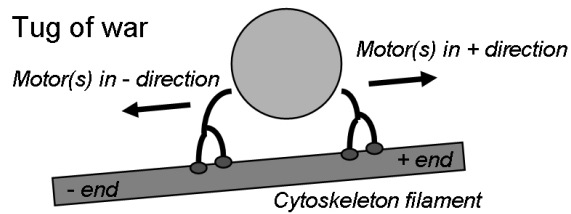

Tug of war between the motors pulling towards the plus and minus direction. This process is mimicked in the simulation by

$$\Delta x = v_0 \times \Delta t \left( \frac{n_{motor+} - n_{motor-}}{n_{motor+} + n_{motor-}} + (\xi_1 - \xi_2) \right)$$

where  $\xi_1$  and  $\xi_2$  are two independent random numbers of the uniform distribution.
